# Supplementary material for: Selenium-Enriched Pollen Grains of Olea europaea L.: Ca2+ Signaling and Germination Under Oxidative Stress
Source: Front Plant Sci. 2019 Dec 11;10:1611. doi: 10.3389/fpls.2019.01611 (PMC6917658; doi:10.3389/fpls.2019.01611)
Supplement: Table S4 — Dataset and statistical analysis for Fig. 4. [file Table_4.xlsx]

## Sheet: Dati Fig4
Ripetizioni	Dose	Tipo trattamento	Germinazione %
1	0	SeO4-2	48
2	0	SeO4-2	47
3	0	SeO4-2	46
4	0	SeO4-2	47
5	0	SeO4-2	45
1	0	Se-Met	48
2	0	Se-Met	47
3	0	Se-Met	46
4	0	Se-Met	47
5	0	Se-Met	45
1	3.4	SeO4-2	32
2	3.4	SeO4-2	30
3	3.4	SeO4-2	31
4	3.4	SeO4-2	30
5	3.4	SeO4-2	31
1	3.4	Se-Met	48
2	3.4	Se-Met	49
3	3.4	Se-Met	45
4	3.4	Se-Met	46
5	3.4	Se-Met	47
1	5	SeO4-2	30
2	5	SeO4-2	29
3	5	SeO4-2	29
4	5	SeO4-2	28
5	5	SeO4-2	30
1	5	Se-Met	45
2	5	Se-Met	48
3	5	Se-Met	46
4	5	Se-Met	49
5	5	Se-Met	46
1	10	SeO4-2	28
2	10	SeO4-2	27
3	10	SeO4-2	28
4	10	SeO4-2	28
5	10	SeO4-2	29
1	10	Se-Met	47
2	10	Se-Met	45
3	10	Se-Met	46
4	10	Se-Met	48
5	10	Se-Met	46
1	50	SeO4-2	27
2	50	SeO4-2	26
3	50	SeO4-2	26
4	50	SeO4-2	26
5	50	SeO4-2	27
1	50	Se-Met	45
2	50	Se-Met	46
3	50	Se-Met	47
4	50	Se-Met	47
5	50	Se-Met	45
1	100	SeO4-2	24
2	100	SeO4-2	23
3	100	SeO4-2	22
4	100	SeO4-2	23
5	100	SeO4-2	24
1	100	Se-Met	44
2	100	Se-Met	46
3	100	Se-Met	47
4	100	Se-Met	45
5	100	Se-Met	46

## Sheet: Stat fig4
ANALISI DELLA VARIANZA										TABELLA ANOVA
VARIABILE: Germinazione %
										FATTORE	DEVIANZA	DF	VARIANZA	F	ProbF
										Dose	897.95	5	179.59	150.705	3.95293e-28	**
Variabili	Tipo trattamento				Medie					Tipo trattamento	3697.35	1	3697.35	3102.67	2.8208e-45	**
Dose	Se-Met		SeO4-2							Dose x Tipo trattamento	794.35	5	158.87	133.317	6.1481e-27	**
0	46.6	ab	46.6	ab	46.6	a				Errore	57.2	48	1.19167
3.4	47	a	30.8	c	38.9	b				Totale	5446.85	59	92.3195
5	46.8	ab	29.2	d	38	bc				C.V. (%): 2,83173763835926
10	46.4	ab	28	d	37.2	cd
50	46	ab	26.4	e	36.2	d
100	45.6	b	23.2	f	34.4	e
Medie	46.4	a	30.7	b	38.55
