# Supplementary material for: Selenium-Enriched Pollen Grains of Olea europaea L.: Ca2+ Signaling and Germination Under Oxidative Stress
Source: Front Plant Sci. 2019 Dec 11;10:1611. doi: 10.3389/fpls.2019.01611 (PMC6917658; doi:10.3389/fpls.2019.01611)
Supplement: Table S5 — Dataset and statistical analysis for Fig. 5. [file Table_5.xlsx]

## Sheet: Dati
Ripetizioni	Se micrM	Tipo Selenio	Dose H2O2	Germinazione %
1	0	SeMet	0	46
2	0	SeMet	0	46
3	0	SeMet	0	45
4	0	SeMet	0	46
5	0	SeMet	0	46
1	3.4	SeMet	0	45
2	3.4	SeMet	0	46
3	3.4	SeMet	0	45
4	3.4	SeMet	0	44
5	3.4	SeMet	0	45
1	10	SeMet	0	40
2	10	SeMet	0	39
3	10	SeMet	0	40
4	10	SeMet	0	41
5	10	SeMet	0	40
1	50	SeMet	0	36
2	50	SeMet	0	36
3	50	SeMet	0	36
4	50	SeMet	0	35
5	50	SeMet	0	37
1	0	SeMet	1	21
2	0	SeMet	1	19
3	0	SeMet	1	20
4	0	SeMet	1	19
5	0	SeMet	1	20
1	3.4	SeMet	1	33
2	3.4	SeMet	1	34
3	3.4	SeMet	1	33
4	3.4	SeMet	1	34
5	3.4	SeMet	1	33
1	10	SeMet	1	42
2	10	SeMet	1	42
3	10	SeMet	1	43
4	10	SeMet	1	42
5	10	SeMet	1	43
1	50	SeMet	1	42
2	50	SeMet	1	41
3	50	SeMet	1	42
4	50	SeMet	1	42
5	50	SeMet	1	43
1	0	SeMet	5	3
2	0	SeMet	5	3
3	0	SeMet	5	2
4	0	SeMet	5	2
5	0	SeMet	5	4
1	3.4	SeMet	5	8
2	3.4	SeMet	5	6.5
3	3.4	SeMet	5	8
4	3.4	SeMet	5	7
5	3.4	SeMet	5	7
1	10	SeMet	5	26
2	10	SeMet	5	27
3	10	SeMet	5	26
4	10	SeMet	5	26.7
5	10	SeMet	5	26
1	50	SeMet	5	41
2	50	SeMet	5	39
3	50	SeMet	5	40
4	50	SeMet	5	41
5	50	SeMet	5	41
1	0	SeO4-2	0	46
2	0	SeO4-2	0	46
3	0	SeO4-2	0	45
4	0	SeO4-2	0	46
5	0	SeO4-2	0	46
1	3.4	SeO4-2	0	30
2	3.4	SeO4-2	0	29
3	3.4	SeO4-2	0	32
4	3.4	SeO4-2	0	29
5	3.4	SeO4-2	0	32
1	10	SeO4-2	0	29
2	10	SeO4-2	0	30
3	10	SeO4-2	0	29
4	10	SeO4-2	0	28
5	10	SeO4-2	0	28
1	50	SeO4-2	0	23
2	50	SeO4-2	0	23
3	50	SeO4-2	0	24
4	50	SeO4-2	0	25
5	50	SeO4-2	0	23
1	0	SeO4-2	1	21
2	0	SeO4-2	1	19
3	0	SeO4-2	1	20
4	0	SeO4-2	1	19
5	0	SeO4-2	1	20
1	3.4	SeO4-2	1	39
2	3.4	SeO4-2	1	35
3	3.4	SeO4-2	1	37
4	3.4	SeO4-2	1	38
5	3.4	SeO4-2	1	37
1	10	SeO4-2	1	41
2	10	SeO4-2	1	42
3	10	SeO4-2	1	41
4	10	SeO4-2	1	40
5	10	SeO4-2	1	41
1	50	SeO4-2	1	41
2	50	SeO4-2	1	42
3	50	SeO4-2	1	41
4	50	SeO4-2	1	41.5
5	50	SeO4-2	1	41
1	0	SeO4-2	5	3
2	0	SeO4-2	5	3
3	0	SeO4-2	5	2
4	0	SeO4-2	5	2
5	0	SeO4-2	5	4
1	3.4	SeO4-2	5	9
2	3.4	SeO4-2	5	8
3	3.4	SeO4-2	5	7
4	3.4	SeO4-2	5	8
5	3.4	SeO4-2	5	7
1	10	SeO4-2	5	26
2	10	SeO4-2	5	25
3	10	SeO4-2	5	25.5
4	10	SeO4-2	5	26
5	10	SeO4-2	5	26
1	50	SeO4-2	5	38
2	50	SeO4-2	5	38
3	50	SeO4-2	5	39
4	50	SeO4-2	5	38
5	50	SeO4-2	5	39

## Sheet: Stat Fig5
ANALISI DELLA VARIANZA												TABELLA ANOVA
VARIABILE: Germinazione %
												FATTORE	DEVIANZA	DF	VARIANZA	F	ProbF
												Dose Se (µM) A	3788.53	3	1262.84	1996.85	2.46748e-86	**
Variabili		Dose H2O2 mM						Medie				Tipo Selenio B	311.052	1	311.052	491.847	1.48551e-39	**
Dose Se (µM)	Tipo Se	0		1		5						Dose H2O2 C	7656.89	2	3828.45	6053.68	9.95451e-102	**
0	SeMet	45.8	a	19.8	n	2.8	p	22.8	g			A x B	113.446	3	37.8153	59.795	6.88041e-22	**
	SeO4-2	45.8	a	19.8	n	2.8	p	22.8	g			A x C	9362.66	6	1560.44	2467.43	8.27753e-103	**
3.4	SeMet	45	a	33.4	i	7.3	o	28.5667	e			B x C	605.641	2	302.821	478.831	1.14644e-50	**
	SeO4-2	30.4	j	37.2	g	7.8	o	25.1333	f			A x B x C	254.635	6	42.4391	67.1062	3.64732e-32	**
10	SeMet	40	e	42.4	b	26.34	l	36.2467	b			Errore	60.712	96	0.632417
	SeO4-2	28.8	k	41	d	25.7	l	31.8333	d			Totale	22153.6	119	186.164
50	SeMet	36	h	42	bc	40.4	de	39.4667	a			C.V. (%): 2,63676
	SeO4-2	23.6	m	41.3	cd	38.4	f	34.4333	c
Tipo Se		Dose H2O2 x Tipo Se						Tipo Se
SeMet		41.7	a	34.4	b	19.21	d	31.77	a
SeO4-2		32.15	c	34.825	b	18.675	d	28.55	b
Dose Se (µM)		Dose H2O2 x Dose Se (µM)						Dose Se (µM)
0		45.8	a	19.8	h	2.8	j	22.8	d
3.4		37.7	d	35.3	e	7.55	i	26.85	c
10		34.4	e	41.7	b	26.02	g	34.04	b
50		29.8	f	41.65	b	39.4	c	36.95	a
		Dose H2O2
Medie		36.925	a	34.6125	b	18.9425	c	30.16
